# Supplementary material for: Drug treatment effects on outcomes in heart failure with preserved ejection fraction: a systematic review and meta-analysis
Source: PubMed Central journal article supplement (PMC5861385; doi:10.1136/heartjnl-2017-311652), 2017-08-05
Supplement: heartjnl-2017-311652supp001.pdf [file heartjnl-2017-311652supp001.pdf]

## **Supplementary materials**

|                                                                                               |         |
|-----------------------------------------------------------------------------------------------|---------|
| Search strategy                                                                               | Page 2  |
| Cochrane Risk of Bias Assessment                                                              | Page 4  |
| Figure 1 - All-cause mortality                                                                | Page 5  |
| A. Stratified by class (pooled RAAS antagonists) (RR)                                         |         |
| B. Stratified by drug class (RD)                                                              |         |
| C. Stratified by entry LV ejection fraction threshold (40 to 49%,<br>$\geq 50\%$ )            |         |
| D. Stratified by follow-up duration (3-12months vs. $>12$ months)                             |         |
| E. Stratified by mean LV ejection fraction ( $<60\%$ and $\geq 60\%$ )                        |         |
| Figure 2 - Cardiovascular mortality                                                           | Page 10 |
| A. By drug type (beta-blockers, RAAS antagonists and other) (RR)                              |         |
| B. By drug type (beta-blockers, RAAS antagonists and other) (RD)                              |         |
| C. By entry LVEF cut-off ( $>40$ and $45\%$ , $>50\%$ )                                       |         |
| D. By follow-up duration (3-12months vs. $>12$ months)                                        |         |
| E. Stratified by mean LV ejection fraction ( $<60\%$ and $\geq 60\%$ )                        |         |
| Figure 3 - Heart failure hospitalisation – mean weighted difference                           | Page 15 |
| A. By drug type (beta-blockers, RAAS antagonists and other) (RR)                              |         |
| B. By drug type (beta-blockers, RAAS antagonists and other) (RD)                              |         |
| C. By entry LVEF cut-off ( $>40$ and $45\%$ , $>50\%$ )                                       |         |
| D. By follow-up duration (3-12months vs. $>12$ months)                                        |         |
| E. Stratified by mean LV ejection fraction ( $<60\%$ and $\geq 60\%$ )                        |         |
| Figure 4 – Exercise outcomes                                                                  | Page 20 |
| Figure 5 – Quality of Life                                                                    | Page 22 |
| Figure 6 – Funnel plot                                                                        | Page 23 |
| A. All-cause mortality                                                                        |         |
| B. Cardiovascular mortality                                                                   |         |
| C. Heart failure hospitalisation                                                              |         |
| Table 1 - Study characteristics for randomised controlled trials                              | Page 24 |
| Table 2 - Summary of effects for all primary and secondary outcomes                           | Page 27 |
| Table 3 – Overview of changes to BNP and NT-pro BNP following treatment in<br>included trials | Page 28 |
| Reference List                                                                                | Page 28 |

## Search Strategy

Medline, Embase and CENTRAL were searched using the following keywords:

- *heart failure AND normal ejection fraction*
- *heart failure AND preserved cardiac function*
- *heart failure AND preserved ejection fraction*
- *diastolic heart failure*
- *diastolic dysfunction*
- *HFpEF*
- *HFnEF*

Cochrane search filter for RCTs was applied

Source: (<http://work.cochrane.org/rct-filters-different-databases>)

| <b>Medline</b>                             | <b>EMBASE</b>                         | <b>Cochrane CENTRAL</b>               |
|--------------------------------------------|---------------------------------------|---------------------------------------|
| 1. Heart failure                           | 1. Heart failure                      | In "Trials"                           |
| 2. Normal ejection fraction                | 2. Normal ejection fraction           | 1. heart failure                      |
| 3. Preserved cardiac function              | 3. Preserved cardiac function         | 2. preserved ejection fraction        |
| 4. Preserved ejection fraction             | 4. Preserved ejection fraction        | 3. preserved cardiac function         |
| 5. 1 and 2                                 | 5. 1 and 2                            | 4. normal ejection fraction           |
| 6. 1 and 3                                 | 6. 1 and 3                            | 5. 1 and 2                            |
| 7. 1 and 4                                 | 7. 1 and 4                            | 6. 1 and 3                            |
| 8. Diastolic heart failure                 | 8. Diastolic heart failure            | 7. 1 and 4                            |
| 9. Diastolic dysfunction                   | 9. Diastolic dysfunction              | 8. "diastolic heart failure"          |
| 10. HFPEF                                  | 10. HFPEF                             | 9. "diastolic dysfunction"            |
| 11. HFNEF                                  | 11. HFNEF                             | 10. "HFNEF"                           |
| 12. Or/5-11                                | 12. Or/5-11                           | 11. "HFPEF"                           |
| 13. Randomized Controlled Trials as Topic/ | 13. Clinical trial/                   | 12. 5 or 6 or 7 or 8 or 9 or 10 or 11 |
| 14. Randomized controlled trial/           | 14. Randomized controlled trial/      |                                       |
| 15. Random Allocation/                     | 15. Randomization/                    |                                       |
| 16. Double Blind Method/                   | 16. Single blind procedure/           |                                       |
| 17. Single Blind Method/                   | 17. Double blind procedure/           |                                       |
| 18. Clinical trial/                        | 18. Crossover procedure/              |                                       |
| 19. Clinical trial, phase i.pt             | 19. Placebo/                          |                                       |
| 20. Clinical trial, phase ii.pt            | 20. Randomi?ed controlled trial\$.tw. |                                       |
| 21. Clinical trial, phase                  | 21. Rct.tw.                           |                                       |
|                                            | 22. Random allocation.tw.             |                                       |

- |                                                                              |                                           |
|------------------------------------------------------------------------------|-------------------------------------------|
| iii.pt                                                                       | 23. Randomly allocated.tw.                |
| 22. Clinical trial, phase iv.pt                                              | 24. Allocated randomly.tw.                |
| 23. Controlled clinical trial.pt                                             | 25. (allocated adj2 random).tw.           |
| 24. Randomized controlled trial.pt                                           | 26. Single blind\$.tw.                    |
| 25. Multicenter study.pt                                                     | 27. Double blind\$.tw.                    |
| 26. Clinical trial.pt                                                        | 28. ((treble or triple) adj (blind\$).tw. |
| 27. Exp Clinical Trials as topic/                                            | 29. Placebo\$.tw.                         |
| 28. Or/13-27                                                                 | 30. Prospective study/                    |
| 29. (clinical adj trial\$.tw                                                 | 31. Or/13-30                              |
| 30. ((singl\$ or doubl\$ or treb\$ or tripl\$) adj (blind\$3 or mask\$3)).tw | 32. Case study/                           |
| 31. Placebos/                                                                | 33. Case report.tw.                       |
| 32. Placebo\$.tw                                                             | 34. Abstract report/ or letter/           |
| 33. Randomly allocated.tw                                                    | 35. Or/32-34                              |
| 34. (allocated adj2 random\$.tw                                              | 36. 31 not 35                             |
| 35. Or/29-34                                                                 | 37. 12 and 36                             |
| 36. 28 or 35                                                                 |                                           |
| 37. Case report.tw                                                           |                                           |
| 38. Letter/                                                                  |                                           |
| 39. Historical article/                                                      |                                           |
| 40. Or/37-39                                                                 |                                           |
| 41. 36 not 40                                                                |                                           |
| 42. 12 and 41                                                                |                                           |

## Cochrane risk of bias assessment

| <b>Author (Trial)</b>    | <b>Selection bias</b> | <b>Performance bias</b> | <b>Detection bias</b> | <b>Reporting bias</b> | <b>Attrition bias</b> | <b>Overall risk of bias</b> |
|--------------------------|-----------------------|-------------------------|-----------------------|-----------------------|-----------------------|-----------------------------|
| Ahmed (DIG)              | Low                   | Low                     | Low                   | Low                   | Low                   | Low                         |
| Aronow                   | Unclear               | High                    | Low                   | Low                   | Low                   | High                        |
| Bergstrom (SWEDIC)       | Unclear               | Low                     | Low                   | Low                   | Low                   | Low                         |
| Cleland (PEP-CHF)        | Low                   | Low                     | Low                   | Low                   | Unclear               | Low                         |
| Conraads                 | Low                   | Low                     | Low                   | Low                   | Low                   | Low                         |
| Davis (ALLHAT)           | Unclear               | Low                     | Low                   | Low                   | Low                   | Low                         |
| Deswal (RAAM-PEF)        | Unclear               | Low                     | Low                   | Low                   | Low                   | Low                         |
| Edelmann (ALDO-DHF)      | Low                   | Low                     | Low                   | Low                   | Low                   | Low                         |
| Hung                     | Low                   | Low                     | Low                   | Low                   | Low                   | Low                         |
| Kasama                   | Low                   | Low                     | Low                   | Low                   | Low                   | Low                         |
| Kitzman                  | Low                   | Low                     | Low                   | Low                   | Low                   | Low                         |
| Kurrelmeyer              | Low                   | Low                     | Low                   | Low                   | Low                   | Low                         |
| Little                   | Low                   | Low                     | Low                   | Low                   | Low                   | Low                         |
| Mak                      | Low                   | High                    | Low                   | Low                   | Low                   | High                        |
| Massie (I-PRESERVE)      | Low                   | Low                     | Low                   | Low                   | Low                   | Low                         |
| Parthasarathy            | Low                   | Low                     | Low                   | Low                   | Low                   | Low                         |
| Pitt (TOPCAT)            | Low                   | Low                     | Low                   | Low                   | Low                   | Low                         |
| Rector (I-PRESERVE)      | Low                   | Low                     | Low                   | Low                   | Low                   | Low                         |
| Redfield (RELAX)         | Low                   | Low                     | Low                   | Low                   | Low                   | Low                         |
| Takeda                   | Unclear               | High                    | Unclear               | Low                   | Low                   | High                        |
| Van Veldhuisen (SENIORS) | Low                   | Low                     | Low                   | Low                   | Low                   | Low                         |
| Yamamoto (J-DHF)         | Unclear               | High                    | Low                   | Low                   | Low                   | High                        |
| Yip (HK-DHF)             | Low                   | High                    | Low                   | Low                   | Unclear               | High                        |
| Yusuf (CHARM-preserved)  | Low                   | Low                     | Low                   | Low                   | Low                   | Low                         |
| Zi                       | Unclear               | Low                     | Low                   | Low                   | Low                   | Low                         |
| Zile                     | Unclear               | Low                     | Low                   | Low                   | Low                   | Low                         |

**Supplementary Figure 1A:** Pooled and individual estimates of relative risk (RR) and 95% confidence intervals (CI) of the primary outcome all cause-mortality for different drug classes. Data is shown stratified by beta-blockers, renin-angiotensin-aldosterone antagonists (RAAS) [which includes Angiotensin Converting Enzyme (ACE) inhibitors, Angiotensin Receptor Blockers (ARB), and Mineralocorticoid Receptor Antagonists(MRA)], and other drug classes. Random effects model used.

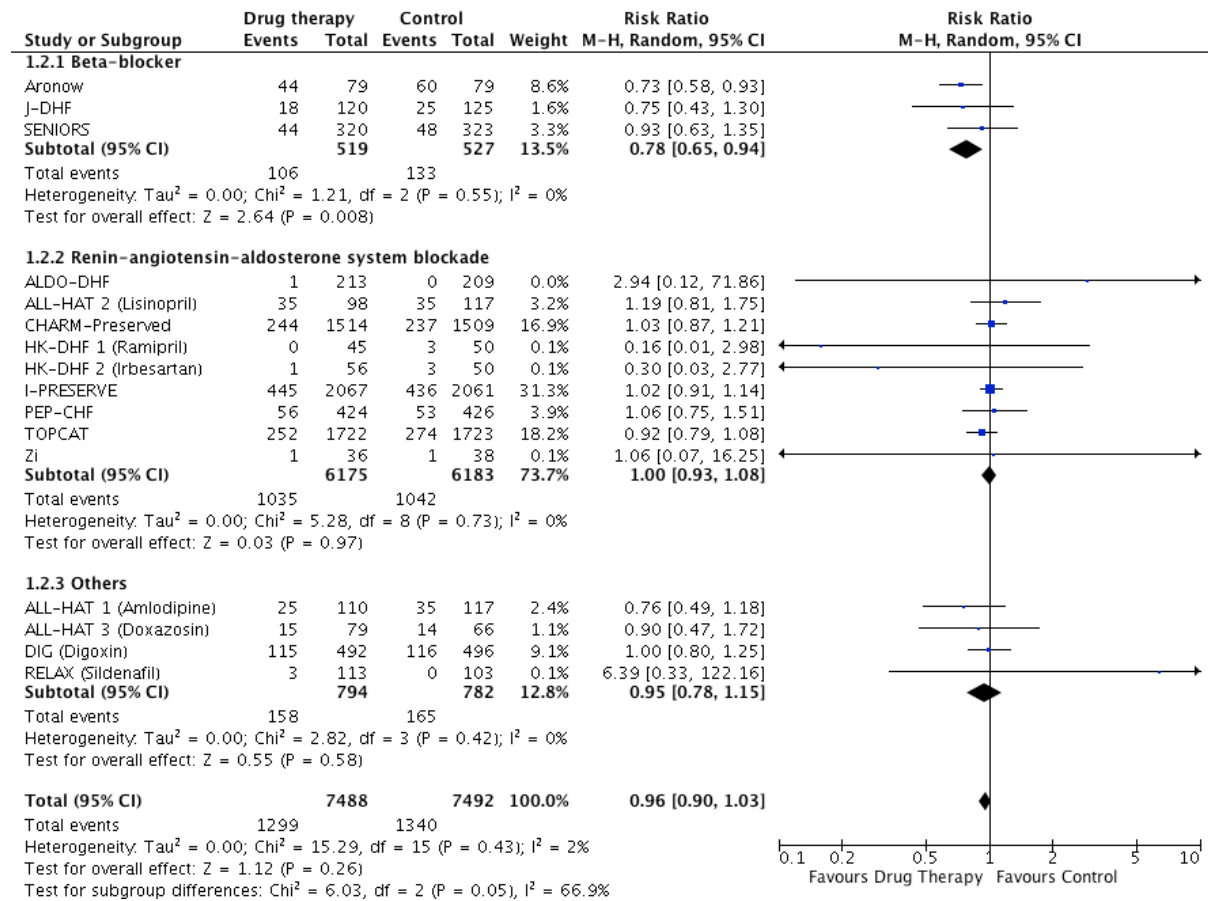

**Supplementary Figure 1B:** Pooled and individual estimates of risk difference (RD) and 95% CI of the primary outcome all cause-mortality for different drug classes. Data is shown stratified by beta-blockers, ACE inhibitors, ARB, and MRA, and other drug classes. Random effects model used.

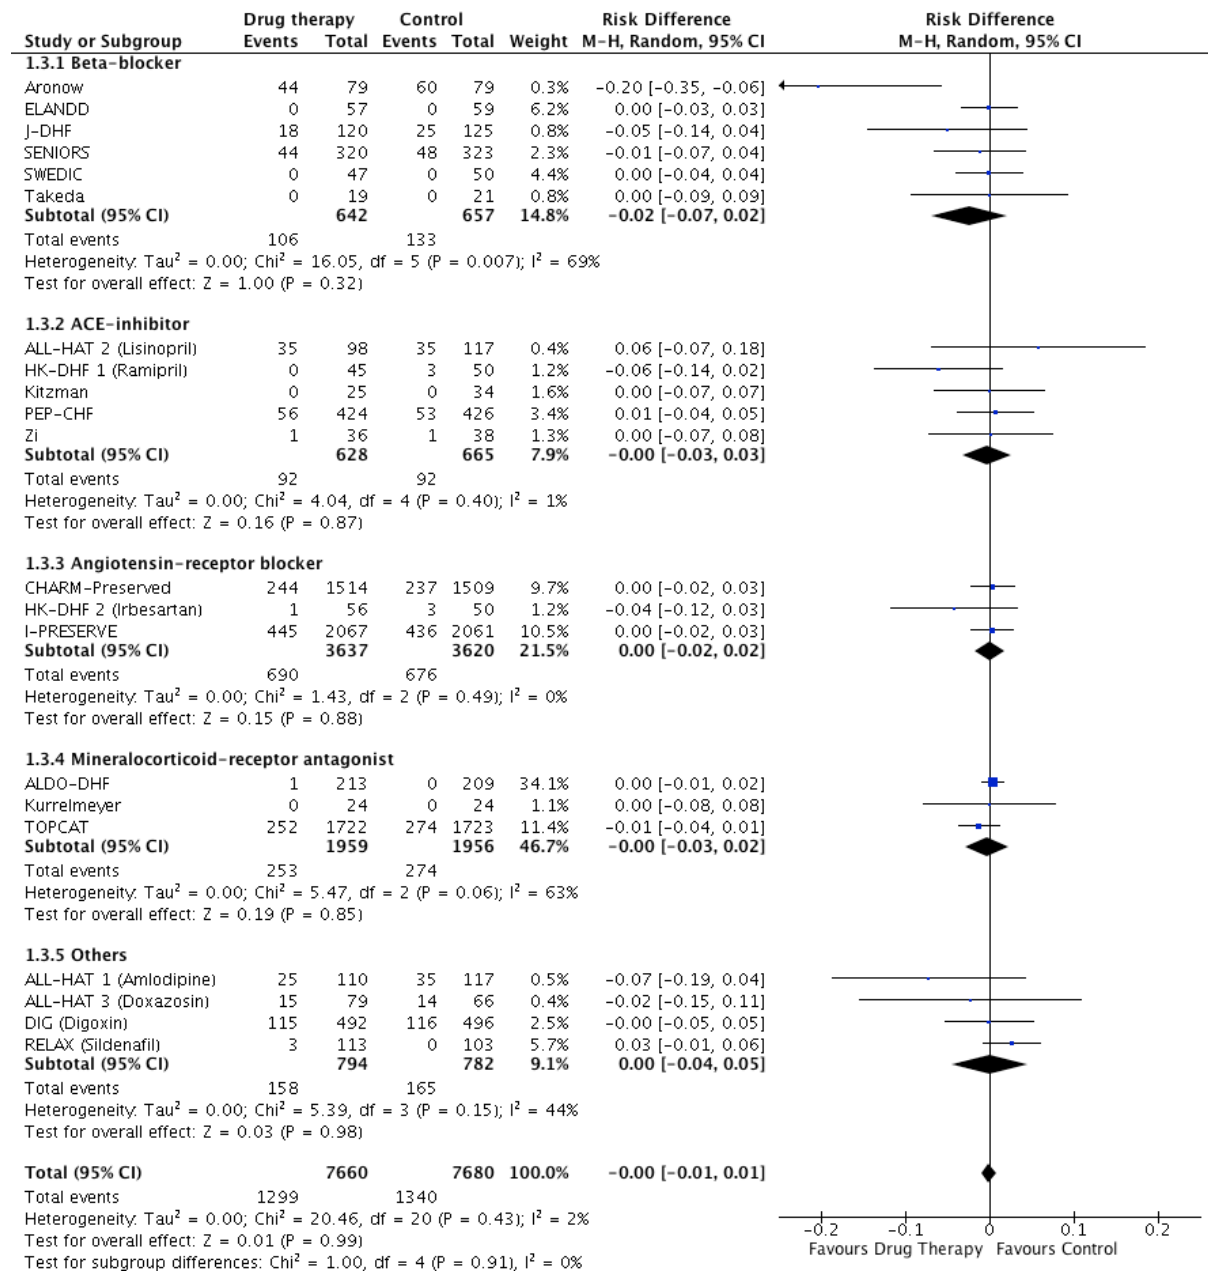

**Supplementary Figure 1C:** Pooled and individual estimates of relative risk (RR) and 95% CI of the primary outcome all cause-mortality stratified by entry LV ejection fraction threshold: 40 to 49% (trials which include patients with HFmrEF), and  $\geq 50\%$  (trials which include only HFpEF). Random effects model used.

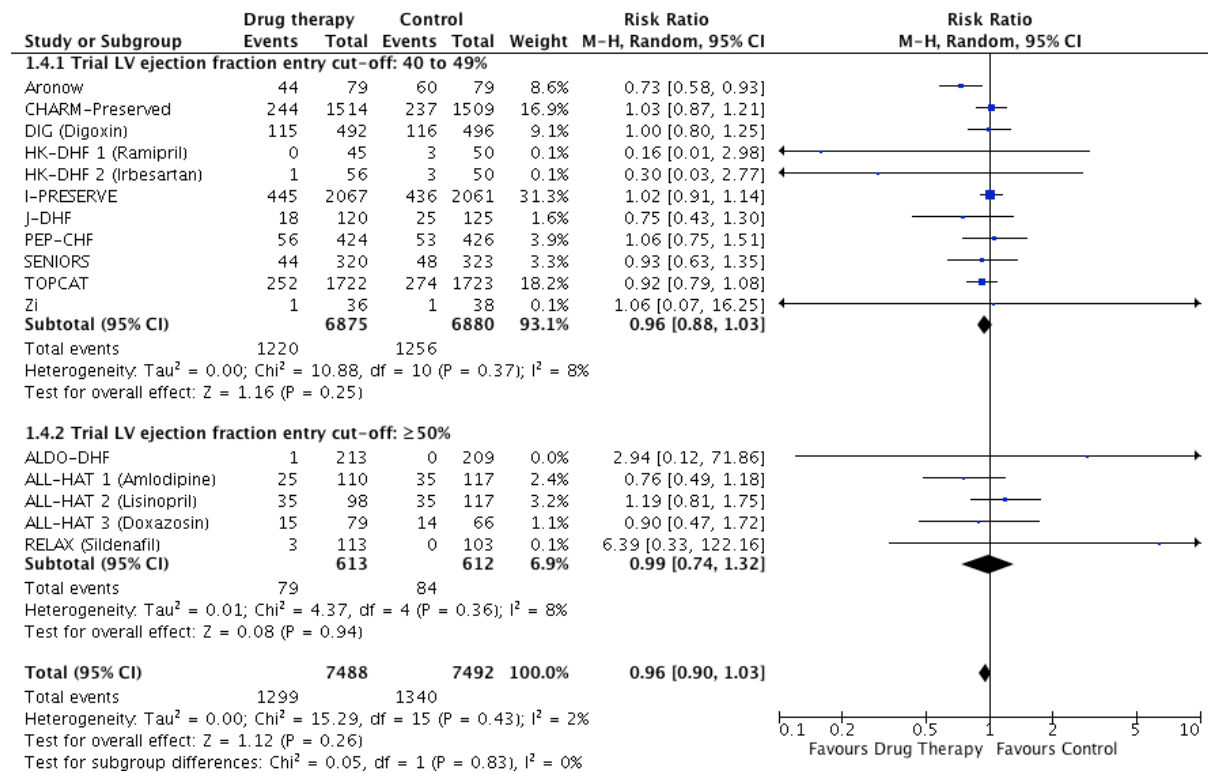

**Supplementary Figure 1D:** Pooled and individual estimates of relative risk (RR) and 95% CI of the primary outcome all cause-mortality stratified by follow-up duration: between 3 to 12 months and greater than 12 months. Random effects model used. PEP-CHF reported outcomes at 12 months follow-up in addition to end of follow-up (mean 2.1 years).

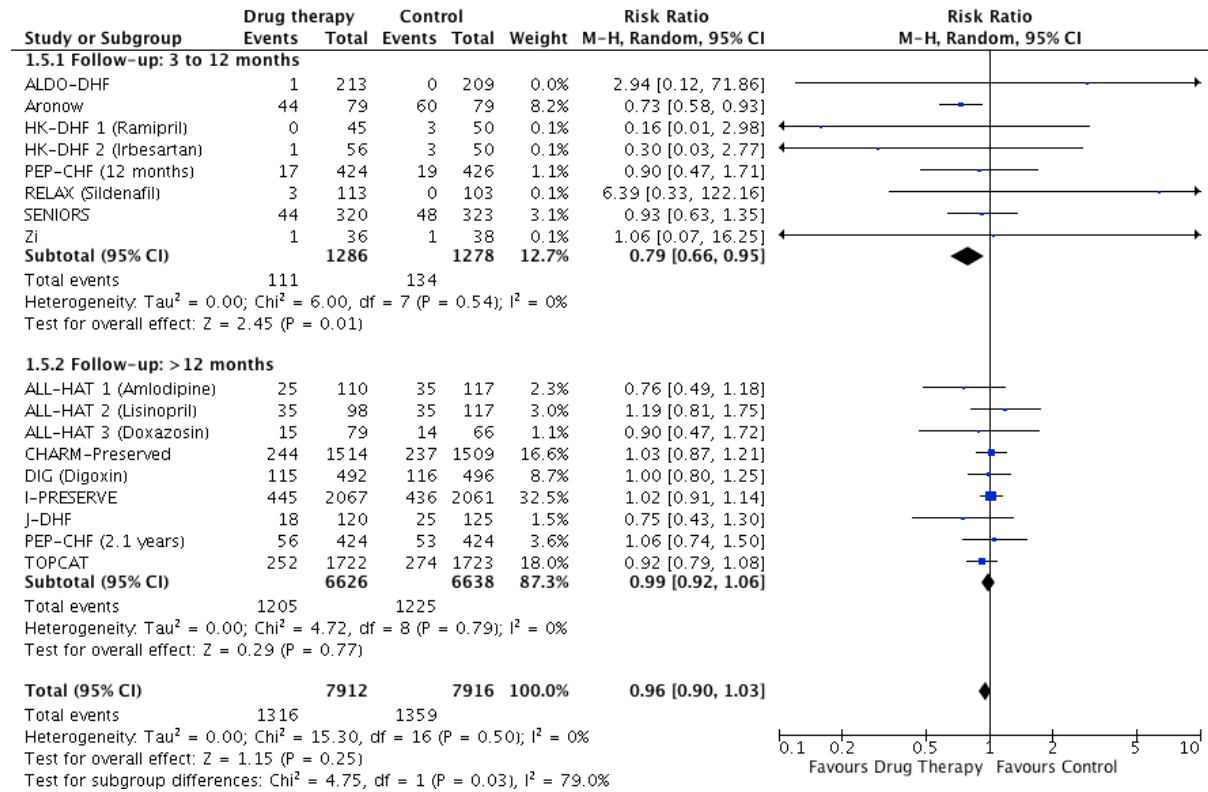



**Supplementary Figure 1E:** Pooled and individual estimates of relative risk (RR) and 95% CI of the primary outcome all cause-mortality stratified by mean LV ejection fraction: <60% and ≥60%. Random effects model used.

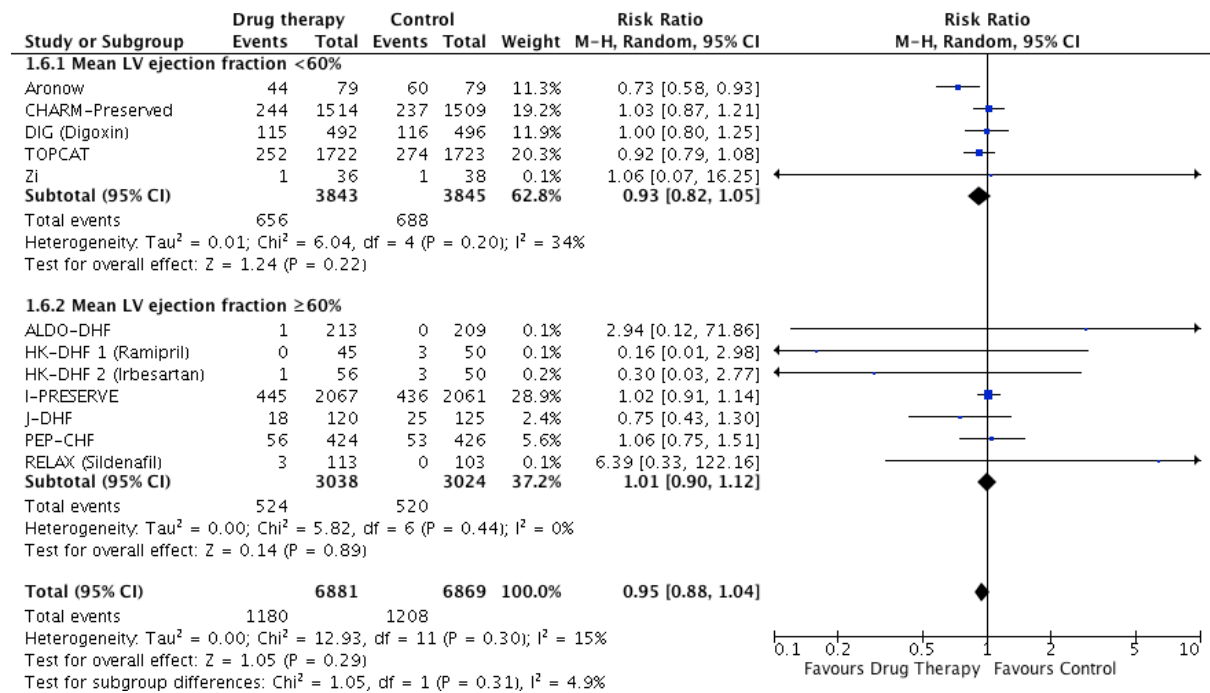

**Supplementary Figure 2A:** Pooled and individual estimates of relative risk (RR) and 95% CI of the cardiovascular mortality for different drug classes. Data is shown stratified by beta-blockers, RAAS antagonists (which includes ACE inhibitors, ARB, and MRA), and other drug classes. Random effects model used.

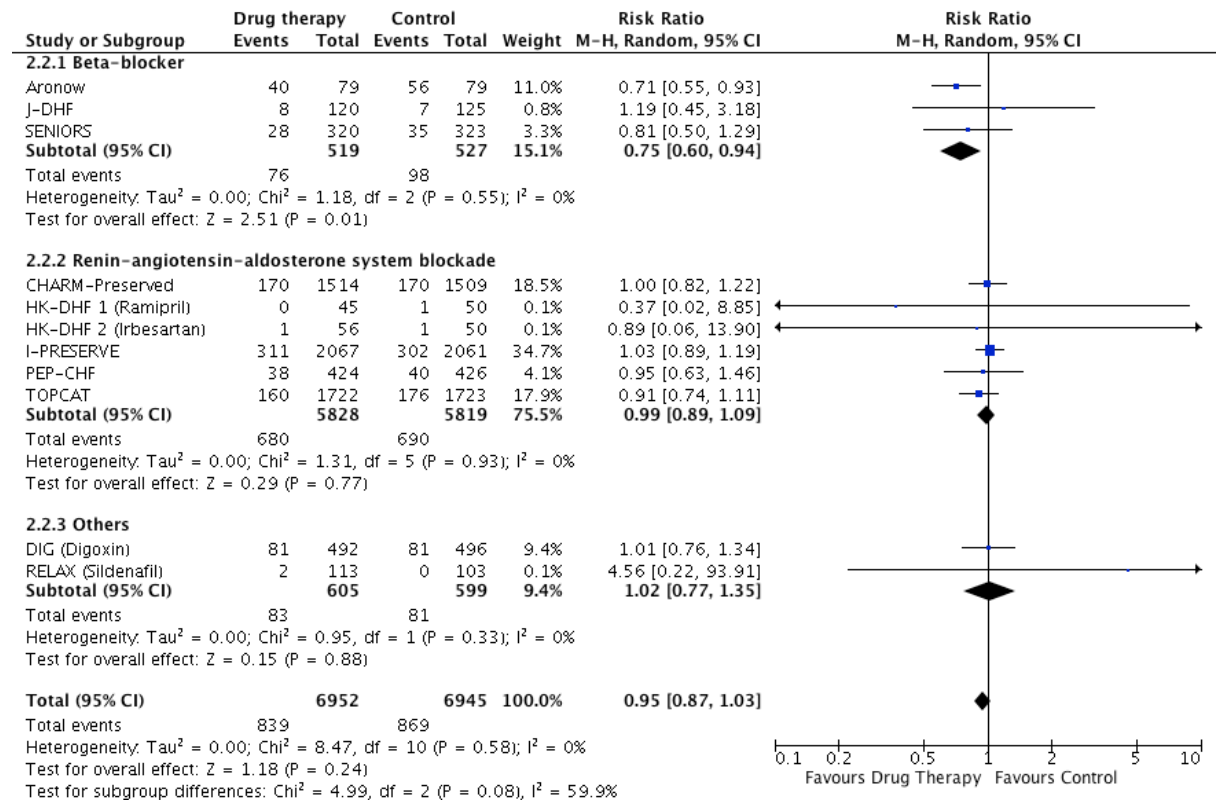

**Supplementary Figure 2B:** Pooled and individual estimates of risk difference (RD) and 95% CI of cardiovascular mortality for different drug classes. Data is shown stratified by beta-blockers, ACE inhibitors, ARB, and MRA, and other drug classes. Random effects model used.

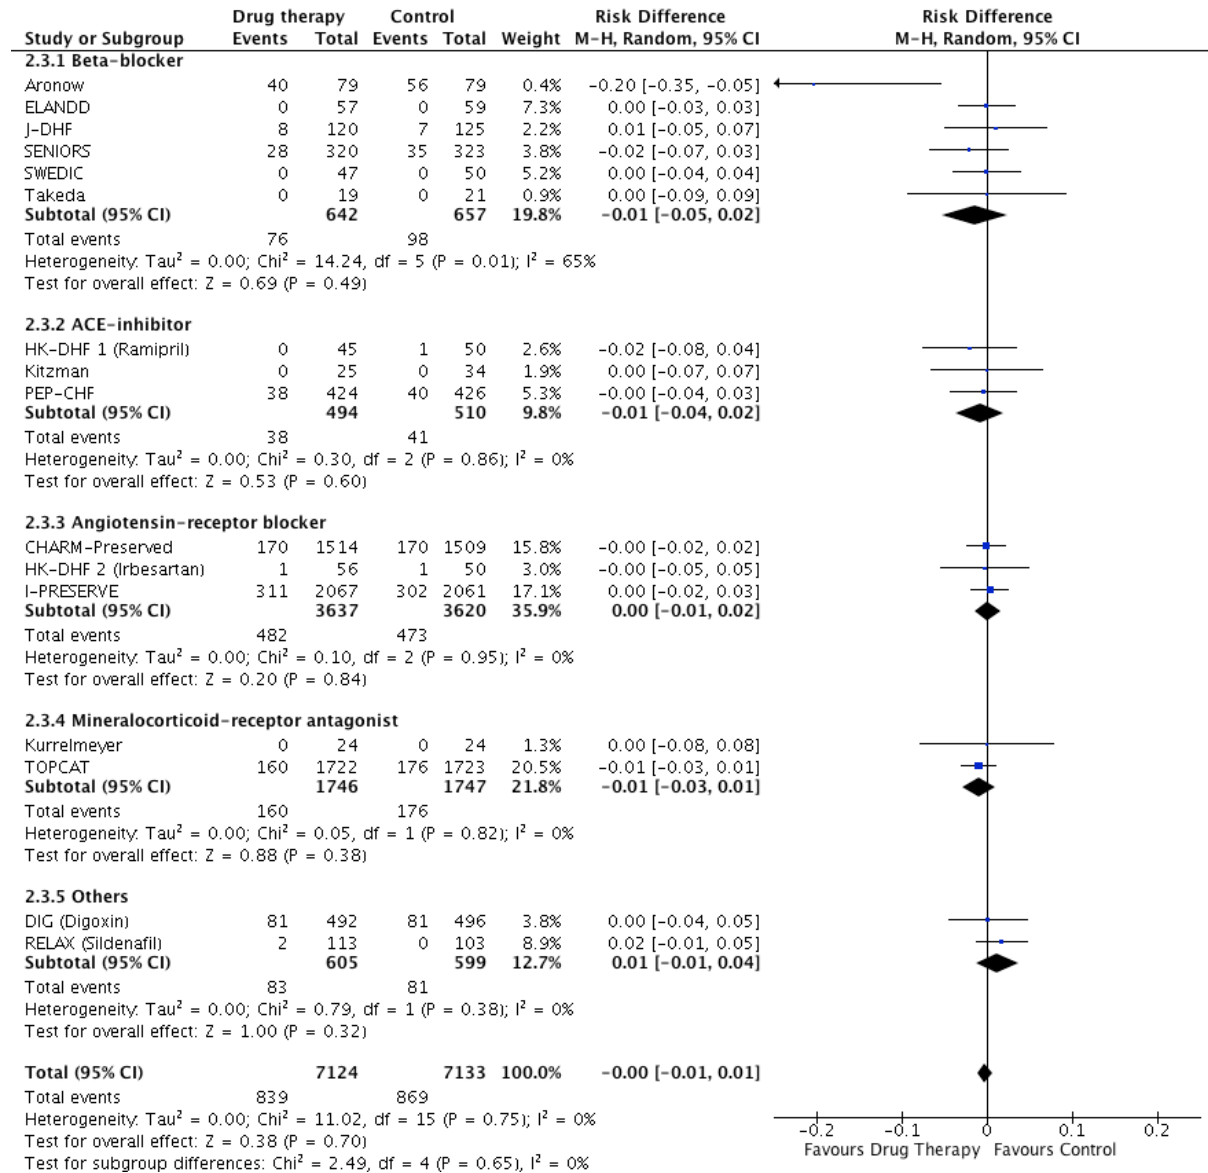

**Supplementary Figure 2C:** Pooled and individual estimates of relative risk (RR) and 95% CI of cardiovascular mortality stratified by entry LV ejection fraction threshold: 40 to 49% (trials which include patients with HFmrEF), and  $\geq 50\%$  (trials which include only HFpEF). Random effects model used. Only one trial (RELAX) using an LV ejection fraction threshold of 50% reported cardiovascular mortality.

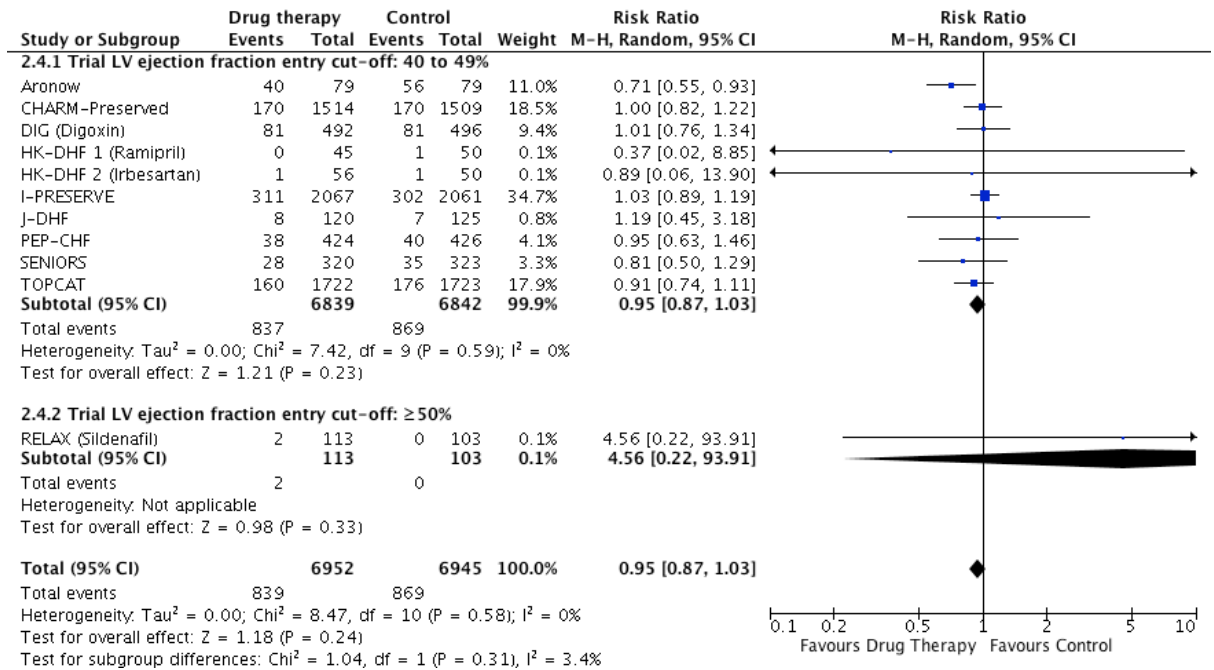

**Supplementary Figure 2D:** Pooled and individual estimates of relative risk (RR) and 95% CI of cardiovascular mortality stratified by follow-up duration: between 3 to 12 months and greater than 12 months. Random effects model used. PEP-CHF reported outcomes at 12 months follow-up in addition to end of follow-up (mean 2.1 years).

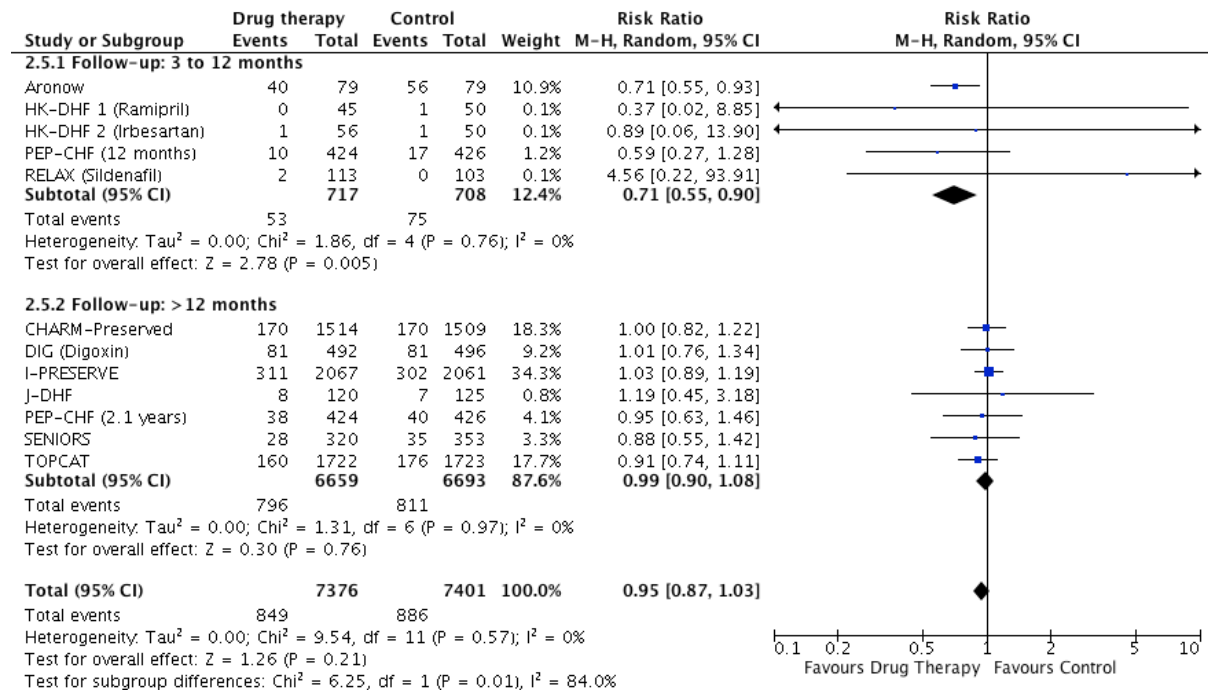

**Supplementary Figure 2E:** Pooled and individual estimates of relative risk (RR) and 95% CI of cardiovascular mortality stratified by mean LV ejection fraction: <60% and ≥60%. Random effects model used.

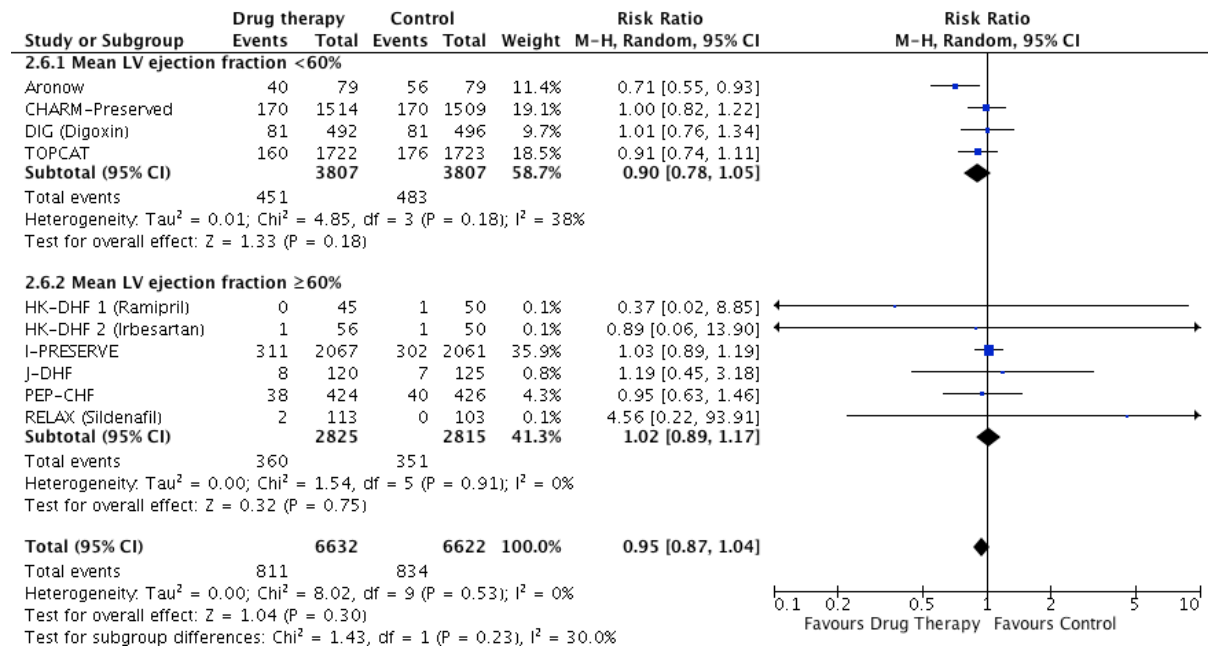

**Supplementary Figure 3A:** Pooled and individual estimates of relative risk (RR) and 95% CI of heart failure hospitalisation for different drug classes. Data is shown stratified by beta-blockers, RAAS antagonists (which includes ACE inhibitors, ARB, and MRA), and other drug classes. Random effects model used.

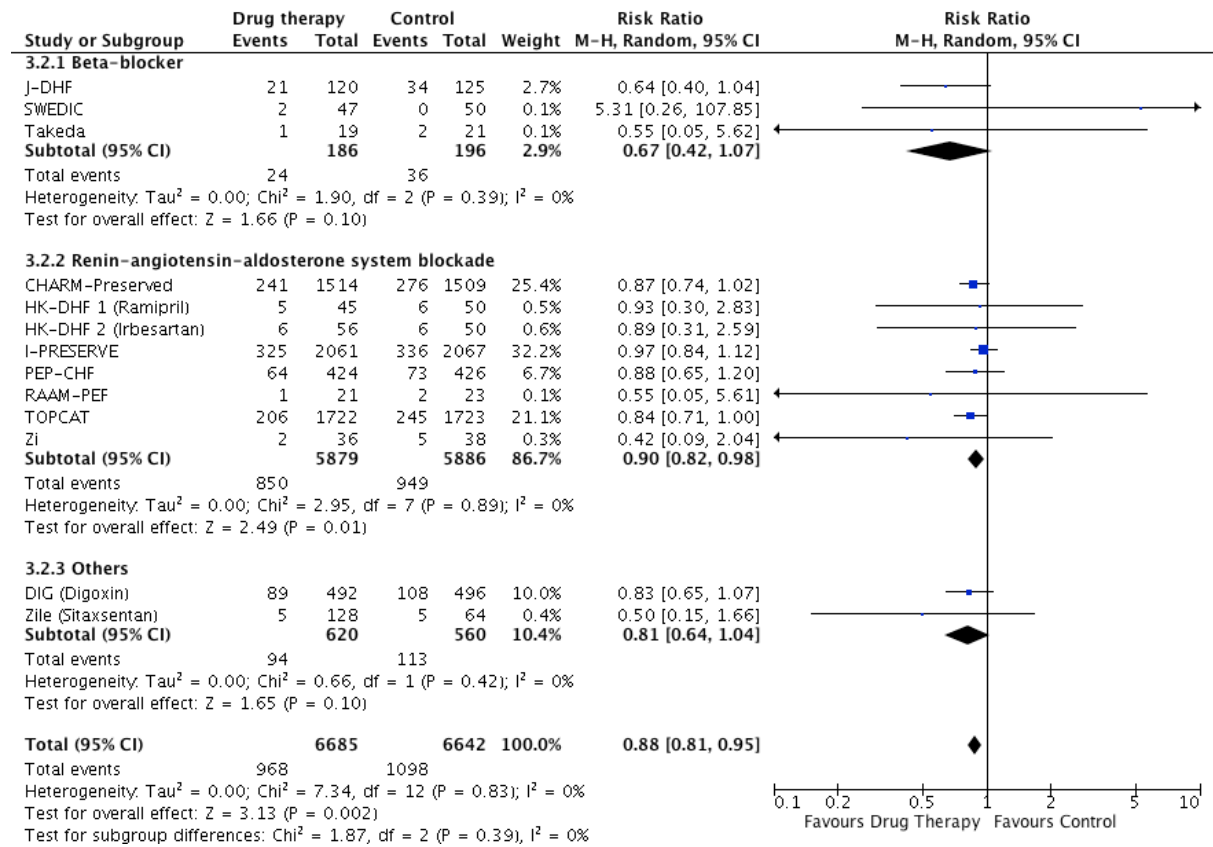

**Supplementary Figure 3B:** Pooled and individual estimates of risk difference (RD) and 95% CI of heart failure hospitalisation for different drug classes. Data is shown stratified by beta-blockers, ACE inhibitors, ARB, and MRA, and other drug classes. Random effects model used.

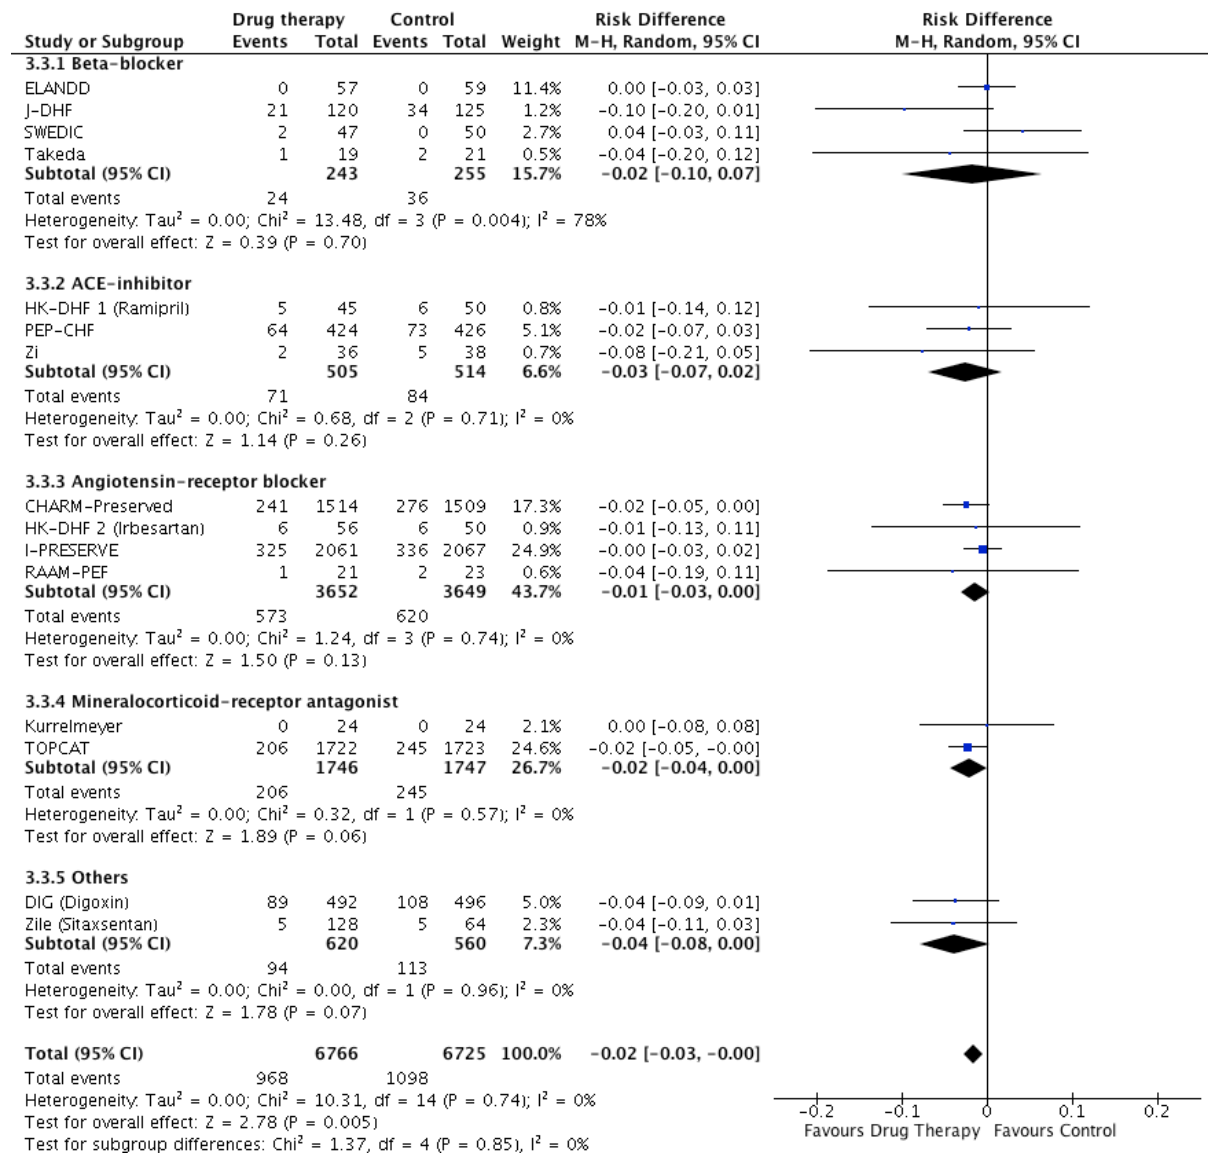



**Supplementary Figure 3C:** Pooled and individual estimates of relative risk (RR) and 95% CI of heart failure hospitalisation stratified by entry LV ejection fraction threshold: 40 to 49% (trials which include patients with HFmrEF), and  $\geq 50\%$  (trials which include only HFpEF). Random effects model used.

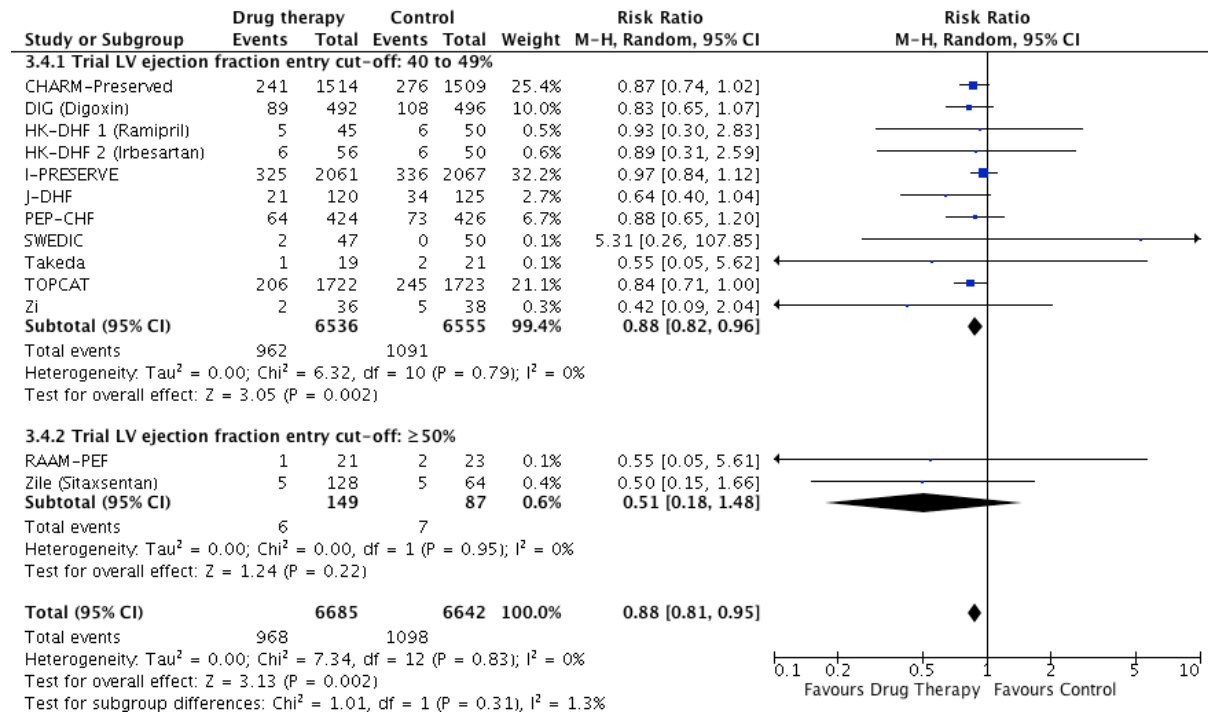

**Supplementary Figure 3D:** Pooled and individual estimates of relative risk (RR) and 95% CI of heart failure hospitalisation stratified by follow-up duration: between 3 to 12 months and greater than 12 months. Random effects model used. PEP-CHF reported outcomes at 12 months follow-up in addition to end of follow-up (mean 2.1 years).

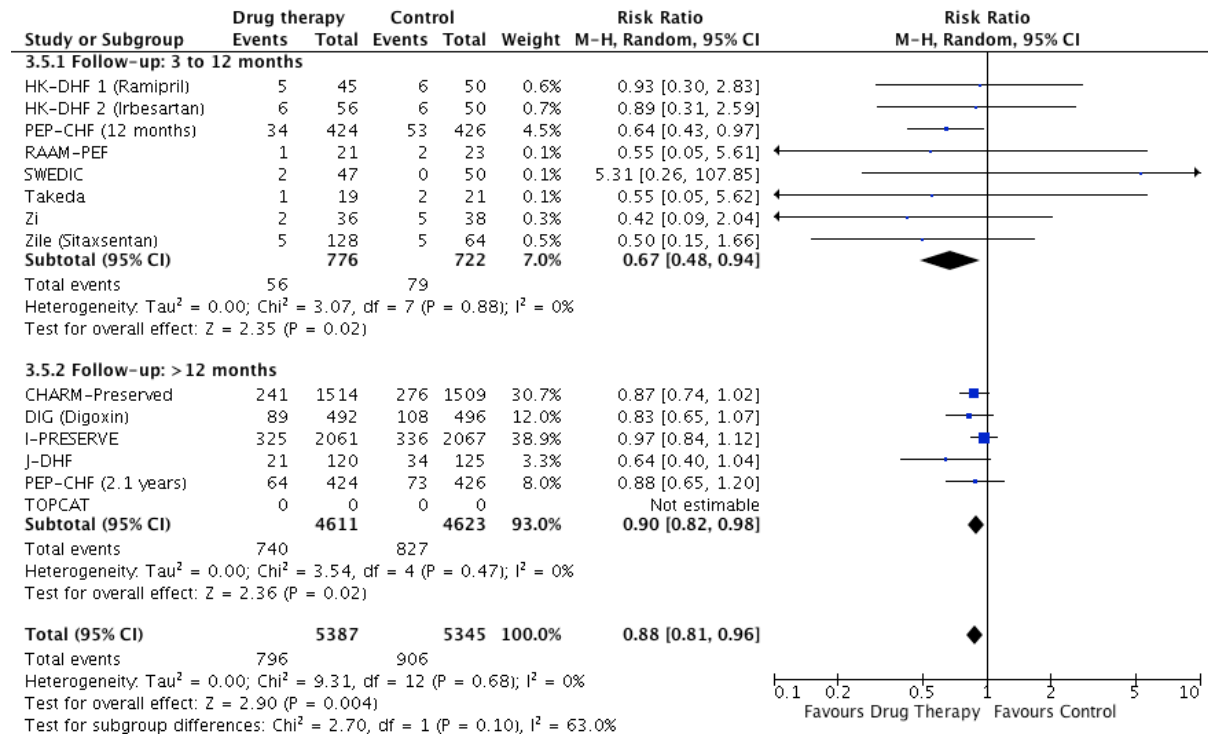

**Supplementary Figure 3E:** Pooled and individual estimates of relative risk (RR) and 95% CI of heart failure hospitalisation stratified by mean LV ejection fraction: <60% and ≥60%. Random effects model used.

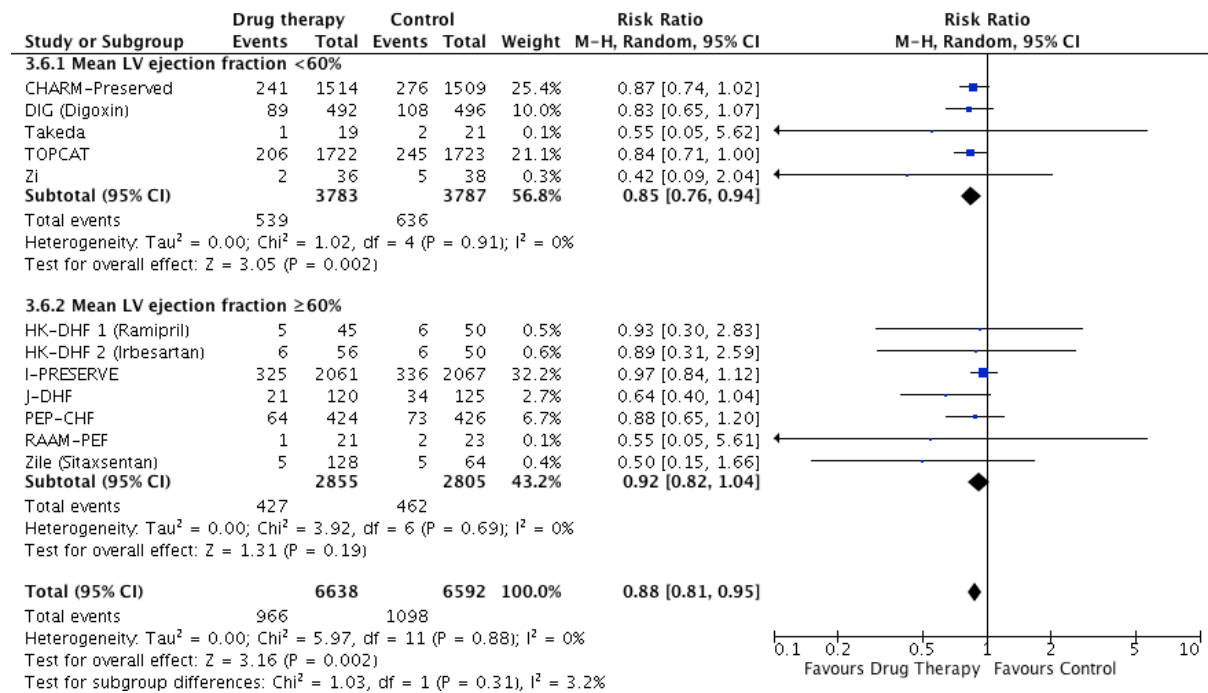

**Supplementary Figure 4:** Pooled and individual estimates of standardised mean difference (MD) in exercise outcomes: (A) exercise capacity, (B) 6 minutes' walk distance, and (C) VO<sub>2</sub> max. Estimates and 95% CI based on a random effects model. Studies were stratified by individual drug classes (beta-blockers, renin-angiotensin-aldosterone system antagonists and other drug classes). Due to small number of studies, no classification was made by individual drug class blockers. RAAS includes Angiotensin Converting Enzyme inhibitors, Angiotensin Receptor Blockers and Mineralocorticoid Receptor Antagonist.

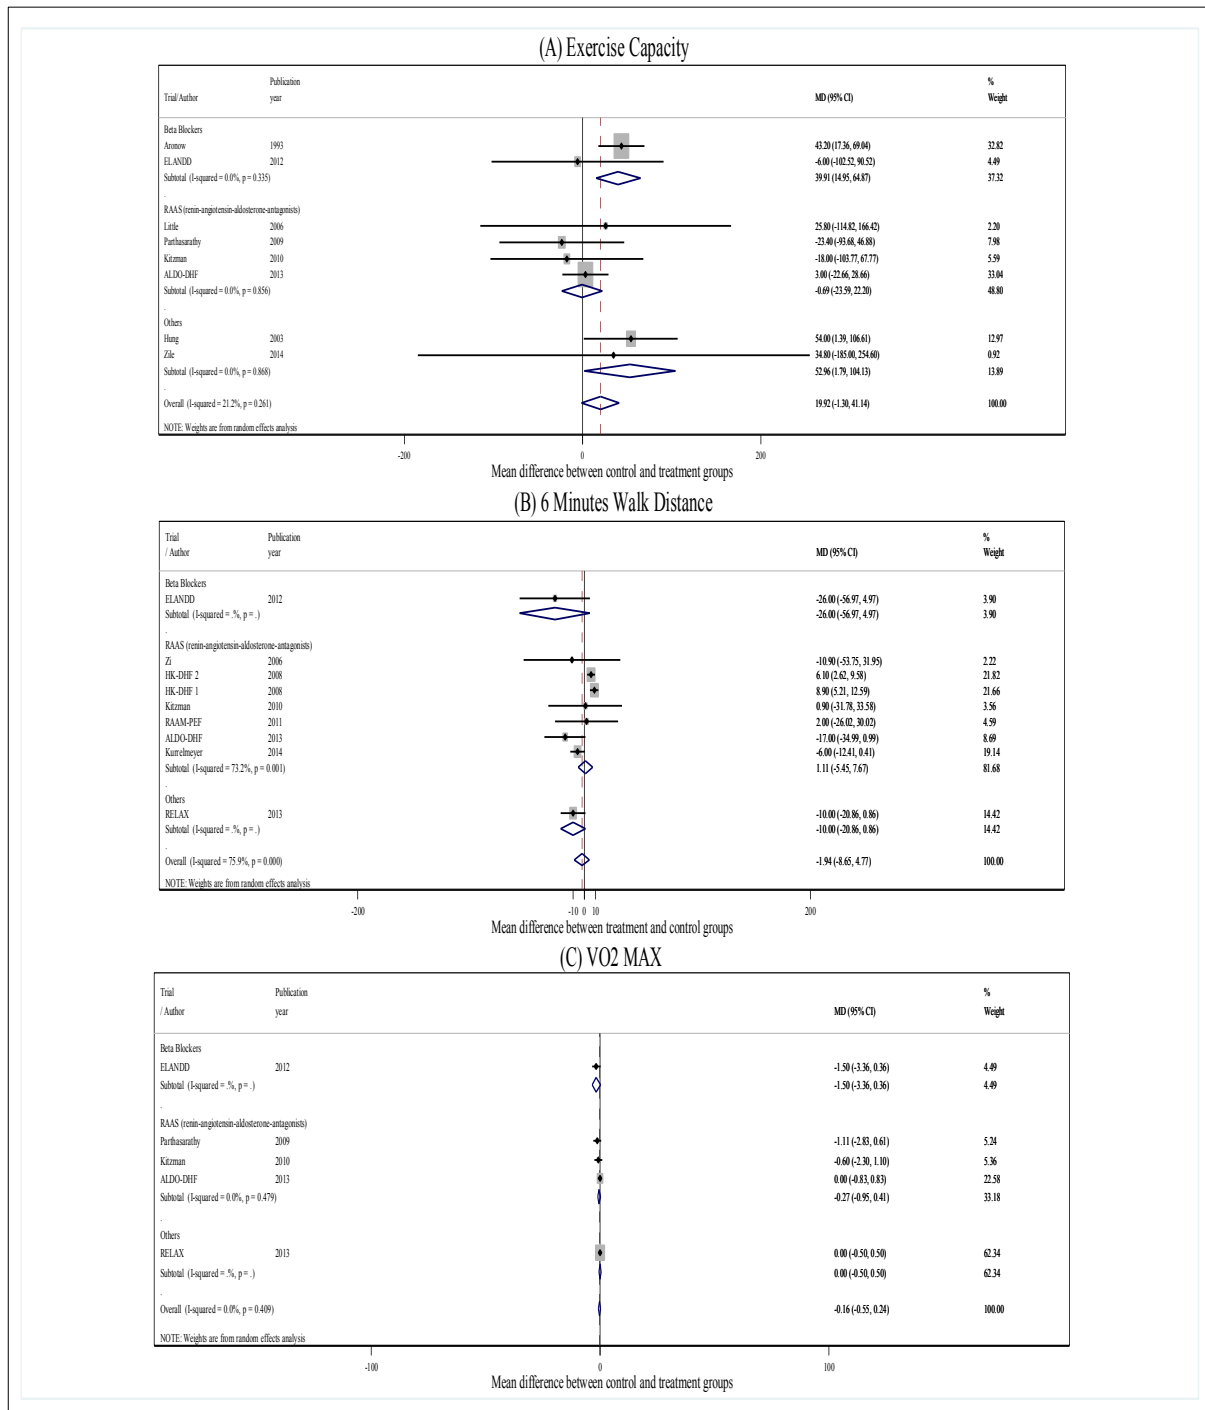

**Supplementary Figure 5:** Pooled and individual estimates of the standardised mean difference (MD) in quality of life, assessed by Minnesota Living with Heart Failure Questionnaire (MLHFQ). Lower MLHFQ scores associated with reduced symptoms, therefore; negative difference indicates improvement. Data is shown stratified by individual drug classes (beta-blockers, ACE inhibitors, angiotensin receptor blockers, mineralocorticoid receptor antagonists, and other drug classes). Estimates and 95% CI were based on a random effects model.

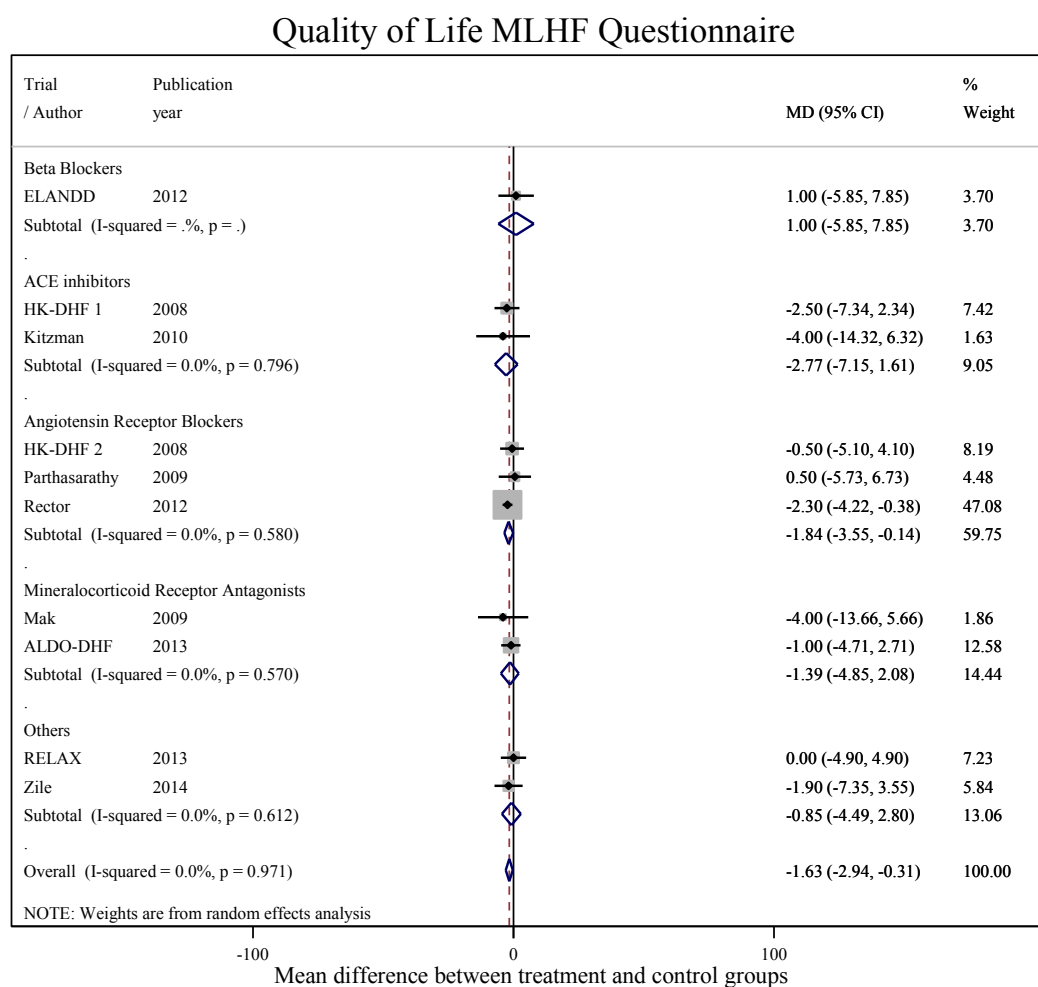

### Supplementary Figure 6 – Funnel plot

Supplementary Figure 6A: All-cause mortality

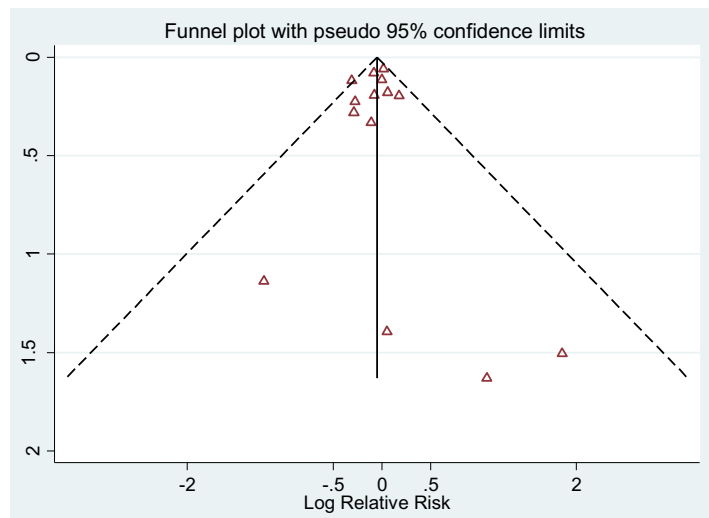

Supplementary Figure 6B: Cardiovascular mortality

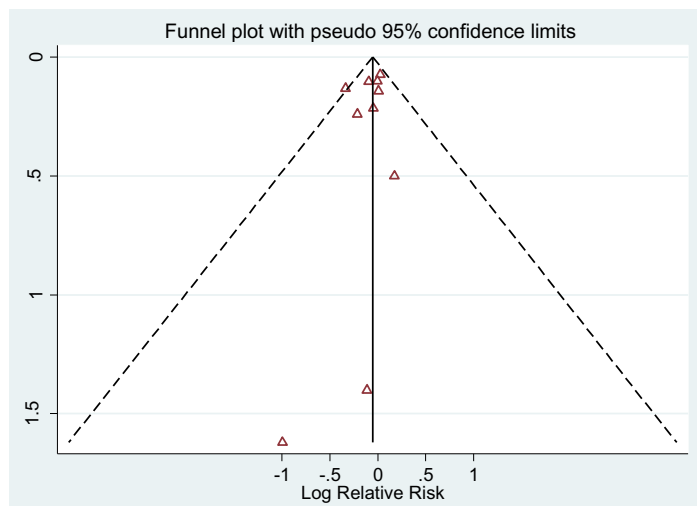

Supplementary Figure 6C: Heart failure hospitalisation

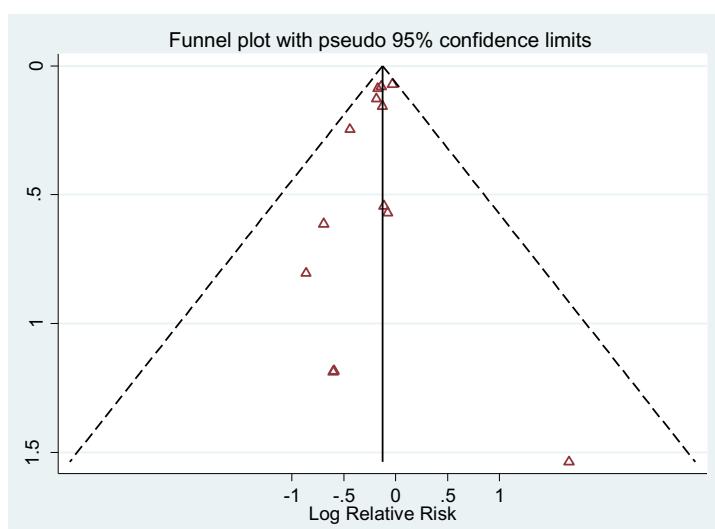

**Supplementary Table 1: Study characteristics for randomized controlled trials**

| Author (Trial)                         | Arm | Year | Intervention | Control             | Entry-EF cut-off | Follow-up (months) | Intervention (N) | Control (N) | Total (N) | Mean LVEF | Outcomes                                                                   |
|----------------------------------------|-----|------|--------------|---------------------|------------------|--------------------|------------------|-------------|-----------|-----------|----------------------------------------------------------------------------|
| <b>Ahmed (DIG)<sup>1</sup></b>         |     | 2005 | Digoxin      | Placebo             | 45%              | 37                 | 492              | 496         | 988       | 55        | All-cause mortality, CV mortality, HFH                                     |
| <b>Aronow<sup>2</sup></b>              |     | 1997 | Propranolol  | No treatment        | 40%              | 12                 | 79               | 79          | 158       | 57        | All-cause mortality, CV mortality,                                         |
| <b>Bergstrom (SWEDIC)<sup>3</sup></b>  |     | 2004 | Carvedilol   | Placebo             | 45%              | 6                  | 47               | 50          | 97        | NR        | HFH, biomarker                                                             |
| <b>Cleland (PEP-CHF)<sup>4</sup></b>   |     | 2006 | Perindopril  | Placebo             | 40%              | 25.2               | 424              | 426         | 850       | 65        | All-cause mortality, CV mortality, HFH, exercise time, biomarker           |
| <b>Conraads<sup>5</sup></b>            |     | 2012 | Nebivolol    | Placebo             | 45%              | 6                  | 57               | 59          | 116       | 63        | 6MWD, VO <sub>2</sub> , QOL, biomarker                                     |
| <b>Davis (ALLHAT)<sup>6</sup></b>      | 1   | 2008 | Amlodipine   | Chlorthalidone      | 50%              | 20.9               | 110              | 117         | 227       | NR        | All-cause mortality                                                        |
| <b>Davis (ALLHAT)</b>                  | 2   | 2008 | Lisinopril   | Chlorthalidone      |                  | 20.9               | 98               |             | 215       | NR        |                                                                            |
| <b>Davis (ALLHAT)</b>                  | 3   | 2008 | Doxazosin    | Chlorthalidone      |                  | 18.6               | 79               | 66          | 145       | NR        |                                                                            |
| <b>Deswal (RAAM-PEF)<sup>7</sup></b>   |     | 2011 | Eplenerone   | Placebo             | 50%              | 6                  | 22               | 22          | 44        | 62        | HFH, 6MWD                                                                  |
| <b>Edelmann (ALDO-DHF)<sup>8</sup></b> |     | 2013 | Spirolactone | Placebo             | 50%              | 12                 | 213              | 209         | 422       | 67        | All-cause mortality, exercise time, 6MWD, VO <sub>2</sub> , QOL, biomarker |
| <b>Hung<sup>9</sup></b>                |     | 2003 | Verapamil    | Placebo             | 50%              | 3                  | 15               | 15          | 15        | 70        | Exercise time                                                              |
| <b>Kasama<sup>10</sup></b>             |     | 2005 | Candesartan  | Placebo             | 40%              | 6                  | 25               | 25          | 50        | 55        | Biomarker                                                                  |
| <b>Kitzman<sup>11</sup></b>            |     | 2010 | Enalapril    | Placebo             | 50%              | 12                 | 35               | 36          | 71        | 65        | Exercise time, 6MWD, VO <sub>2</sub> , QOL, biomarker                      |
| <b>Kurrelmeyer<sup>12</sup></b>        |     | 2014 | Spirolactone | Placebo             | 50%              | 6                  | 24               | 24          | 48        | 63        | 6MWD, Biomarker                                                            |
| <b>Little<sup>13</sup></b>             |     | 2006 | Losartan     | Hydrochlorothiazide | 50%              | 6                  | 19               | 21          | 40        | 67        | Exercise time, VO <sub>2</sub> ,                                           |
| <b>Mak<sup>14</sup></b>                |     | 2009 | Epleronone   | Placebo             | 45%              | 12                 | 24               | 20          | 44        | 63        | QOL, biomarker                                                             |

|                                               |   |      |                |              |     |      |      |      |      |    |                                                              |
|-----------------------------------------------|---|------|----------------|--------------|-----|------|------|------|------|----|--------------------------------------------------------------|
| <b>Massie (I-PRESERVE)<sup>15</sup></b>       |   | 2008 | Irbesartan     | Placebo      | 45% | 49.5 | 2067 | 2061 | 4128 | 60 | All-cause mortality, CV mortality, HFH, QOL, biomarker       |
| <b>Parthasarathy<sup>16</sup></b>             |   | 2009 | Valsartan      | Placebo      | 40% | 3.5  | 70   | 82   | 152  | 71 | Exercise time, 6MWD, VO <sub>2</sub> , QOL, biomarker        |
| <b>Pitt (TOPCAT)<sup>17</sup></b>             |   | 2014 | Spironolactone | Placebo      | 45% | 49.5 | 1722 | 1723 | 3445 | 56 | All-cause mortality, CV mortality, HFH                       |
| <b>Rector (I-PRESERVE)<sup>18</sup></b>       |   | 2012 | Irbesartan     | Placebo      | 45% | 56   | 1102 | 1103 | 2205 | NR | QOL                                                          |
| <b>Redfield (RELAX)<sup>19</sup></b>          |   | 2013 | Sildenafil     | Placebo      | 50% | 6    | 113  | 103  | 216  | 60 | All-cause mortality, 6MWD, VO <sub>2</sub> , QOL, biomarker  |
| <b>Solomon (CHARM-Preserved)<sup>20</sup></b> |   | 2004 | Candesartan    | Placebo      | 40% | 36.6 | 1514 | 1509 | 3023 | 54 | All-cause mortality                                          |
| <b>Takeda<sup>21</sup></b>                    |   | 2004 | Carvedilol     | No treatment | 45% | 12   | 19   | 21   | 40   | 57 | HFH, QOL, biomarker                                          |
| <b>Van Veldhuisen (SENIORS)<sup>22</sup></b>  |   | 2009 | Nebivolol      | Placebo      | 35% | 21   | 320  | 323  | 643  | NA | All-cause mortality, CV mortality                            |
| <b>Yamamoto (J-DHF)<sup>23</sup></b>          |   | 2013 | Carvedilol     | Placebo      | 40% | 38.4 | 120  | 125  | 245  | 63 | All-cause mortality, CV mortality, HFH                       |
| <b>Yip (HK-DHF)<sup>24</sup></b>              | 1 | 2008 | Ramipril       | Diuretics    | 45% | 12   | 45   | 50   | 151  | 67 | All-cause mortality, CV mortality, HFH, 6MWD, QOL, biomarker |
| <b>Yip (HK-DHF)<sup>24</sup></b>              | 2 | 2008 | Irbesartan     |              |     | 12   | 56   |      |      | 68 |                                                              |
| <b>Yusuf (CHARM-Preserved)<sup>25</sup></b>   |   | 2003 | Candesartan    | Placebo      | 40% | 36.6 | 1514 | 1509 | 3023 | 54 | CV mortality, HFH                                            |
| <b>Zi<sup>26</sup></b>                        |   | 2003 | Quinapril      | Placebo      | 40% | 6    | 36   | 38   | 74   | 59 | All-cause mortality, HFH, 6MWD                               |
| <b>Zile<sup>27</sup></b>                      |   | 2014 | Sitaxsentan    |              | 50% | 6    | 128  | 64   | 192  | 61 | HFH, exercise time, QOL                                      |



**Supplementary Table 2:** Summary of effects for all primary and secondary outcomes by stratification

| Outcome                                                   | All-cause mortality                | Cardiovascular mortality           | Heart failure hospitalisation      | Exercise capacity                     | 6MWD                     | VO <sub>2</sub> max                   | MLHFQ                                 |
|-----------------------------------------------------------|------------------------------------|------------------------------------|------------------------------------|---------------------------------------|--------------------------|---------------------------------------|---------------------------------------|
| <b>Overall</b>                                            | 0.96<br>0.90 to 1.03               | 0.95<br>0.87 to 1.03               | <b>0.88</b><br><b>0.81 to 0.95</b> | 19.92<br>-1.30 to 41.14               | -1.94<br>-8.66 to 4.77   | -0.16<br>-0.55 to 0.24                | <b>-1.63</b><br><b>-2.94 to -0.31</b> |
| <b>Stratified by drug class</b>                           |                                    |                                    |                                    |                                       |                          |                                       |                                       |
| <b>Beta-blockers</b>                                      | <b>0.78</b><br><b>0.65 to 0.94</b> | <b>0.75</b><br><b>0.60 to 0.94</b> | 0.67<br>0.42 to 1.07               | <b>39.91</b><br><b>14.95 to 64.87</b> | -26.00<br>-56.97 to 4.97 | -1.50<br>-3.36 to 0.36                | 1.00<br>-5.85 to 7.85                 |
| <b>RAAS blockers</b>                                      | 1.00<br>0.93 to 1.08               | 0.99<br>0.89 to 1.09               | <b>0.90</b><br><b>0.82 to 0.98</b> | -0.69<br>-23.59 to 22.20              | 1.11<br>-5.45 to 7.67    | -0.27<br>-0.95 to 0.41                | -                                     |
| <b>ACE inhibitors</b>                                     | 1.10<br>0.85 to 1.43               | 0.94<br>0.62 to 1.43               | 0.86<br>0.64 to 1.15               | -                                     | -                        | -                                     | -2.77<br>-7.15 to 1.61                |
| <b>ARB</b>                                                | 1.02<br>0.93 to 1.12               | 1.02<br>0.90 to 1.14               | 0.92<br>0.83 to 1.02               | -                                     | -                        | -                                     | <b>-1.84</b><br><b>-3.55 to -0.14</b> |
| <b>MRA</b>                                                | 0.92<br>0.79 to 1.08               | 0.91<br>0.74 to 1.11               | 0.84<br>0.71 to 1.00               | -                                     | -                        | -                                     | -1.39<br>-4.85 to 2.08                |
| <b>Others</b>                                             | 0.95<br>0.78 to 1.15               | 1.02<br>0.77 to 1.35               | 0.81<br>0.64 to 1.04               | 52.96<br>-1.30 to 104.13              | -1.94<br>-8.65 to 4.77   | -0.00<br>-0.50 to 0.50                | -0.85<br>-4.49 to 2.80                |
| <b>Stratified by follow-up duration</b>                   |                                    |                                    |                                    |                                       |                          |                                       |                                       |
| <b>3 to 12 months</b>                                     | <b>0.79</b><br><b>0.66 to 0.95</b> | <b>0.71</b><br><b>0.55 to 0.90</b> | <b>0.67</b><br><b>0.48 to 0.94</b> | -                                     | -                        | -                                     | -1.03<br>-2.84 to 0.78                |
| <b>&gt;12 months</b>                                      | 0.99<br>0.92 to 1.06               | 0.99<br>0.90 to 1.08               | <b>0.90</b><br><b>0.82 to 0.98</b> | -                                     | -                        | -                                     | <b>-2.30</b><br><b>-4.22 to -0.38</b> |
| <b>Stratified by trial LV ejection fraction threshold</b> |                                    |                                    |                                    |                                       |                          |                                       |                                       |
| <b>40 to 49%</b>                                          | 0.96<br>0.88 to 1.03               | 0.95<br>0.87 to 1.03               | <b>0.88</b><br><b>0.82 to 0.96</b> | 17.03<br>-29.36 to 63.41              | -                        | <b>-1.29</b><br><b>-2.55 to -0.03</b> | <b>-1.82</b><br><b>-3.37 to -0.28</b> |
| <b>≥50%</b>                                               | 0.99<br>0.74 to 1.32               | -                                  | 0.51<br>0.18 to 1.48               | 11.33<br>-10.56 to 33.22              | -                        | -0.03<br>-0.34 to 0.28                | -1.11<br>-3.63 to 1.42                |
| <b>Stratified by mean LV ejection fraction</b>            |                                    |                                    |                                    |                                       |                          |                                       |                                       |
| <b>&lt;60%</b>                                            | 0.93<br>0.82 to 1.05               | 0.90<br>0.78 to 1.05               | <b>0.85</b><br><b>0.76 to 0.94</b> | -                                     | -                        | -                                     | -                                     |
| <b>≥60%</b>                                               | 0.95<br>0.88 to 1.04               | 1.02<br>0.89 to 1.17               | 0.92<br>0.82 to 1.04               | -                                     | -                        | -                                     | -                                     |

Data presented as risk ratios (for all-cause and cardiovascular mortality and hospitalisation outcomes) or mean difference (exercise capacity, 6MWD, VO<sub>2</sub> max and MLHFQ), with 95% CI. 6MWD – six-minute walk distance; MLHFQ – Minnesota living with heart failure questionnaire. Only one trial with LV ejection fraction threshold ≥50% reported cardiovascular mortality.

**Supplementary Table 3:** Overview of changes to BNP and NT-pro BNP following treatment in included trials

| Author, Trial      | Year | Drug           | Follow-up | Study drug N | Study drug baseline | Study drug follow-up | Control N | Control baseline | Control follow-up | Mean change difference |
|--------------------|------|----------------|-----------|--------------|---------------------|----------------------|-----------|------------------|-------------------|------------------------|
| <b>BNP</b>         |      |                |           |              |                     |                      |           |                  |                   |                        |
| Bergstrom, SWEDIC  | 2004 | Carvedilol     | 6 months  | 47           | 28                  | 28                   | 50        | 28               | 42                |                        |
| Kasama             | 2005 | Candesartan    | 6 months  | 25           | 202                 | 134                  | 25        | 204              | 193               |                        |
| Kitzman            | 2010 | Enalapril      | 12 months | 35           | 78                  | 84                   | 36        | 64               | 67                |                        |
| Kurrelmeyer        | 2014 | Spironolactone | 6 months  | 24           | 139                 | 119                  | 24        | 215              | 167               |                        |
| Mak                | 2009 | Eplerone       | 12 months | 24           | 219                 | 158                  | 20        | 192              | 123               |                        |
| Parthasarathy      | 2009 | Valsartan      | 14 weeks  | 61           | 93                  | 94                   | 74        | 120              | 110               |                        |
| Takeda             | 2004 | Carvedilol     | 12 months | 19           | 172                 | 75                   | 21        | 150              | 174               |                        |
| <b>NT-proBNP</b>   |      |                |           |              |                     |                      |           |                  |                   |                        |
| Cleland, PEP-CHF   | 2006 | Perindopril    | 2.1 years | 191          | 335                 |                      | 184       | 453              |                   | -149                   |
| Conraads, ELANDD   | 2012 | Nebivolol      | 6 months  | 57           | 147                 | 162                  | 59        | 126              | 99                |                        |
| Edelman, ALDO-DHF  | 2013 | Spironolactone | 12 months | 204          | 179                 | 152                  | 196       | 148              | 165               |                        |
| Massie, I-PRESERVE | 2008 | Irbesartan     | 6 months  | 2067         | 360                 |                      | 2061      | 320              |                   | -11                    |
| Redfield, RELAX    | 2013 | Sildenafil     | 24 weeks  | 95           | 757                 |                      | 94        | 648              |                   | 38                     |
| Yip-1, HK-DHF      | 2008 | Ramipril       | 12 months | 45           | 488                 | 314                  | 50        | 566              | 334               |                        |
| Yip-2, HK-DHF      | 2008 | Irbesartan     | 12 months | 56           | 568                 | 443                  | 50        | 566              | 334               |                        |

1. Ahmed A, Rich MW, Love TE, et al. Digoxin and reduction in mortality and hospitalization in heart failure: a comprehensive post hoc analysis of the DIG trial. *European heart journal* 2006; 27(2).  
<http://onlinelibrary.wiley.com/o/cochrane/clcentral/articles/684/CN-00561684/frame.html>  
<http://eurheartj.oxfordjournals.org/content/ehj/27/2/178.full.pdf>.
2. Aronow WS, Ahn C, Kronzon I. Effect of propranolol versus no propranolol on total mortality plus nonfatal myocardial infarction in older patients with prior myocardial infarction, congestive heart failure, and left ventricular ejection fraction > or = 40% treated with diuretics plus angiotensin-converting enzyme inhibitors. *The American journal of cardiology* 1997;80(2):207-9. [published Online First: 1997/07/15]
3. Bergström A, Andersson B, Edner M, et al. Effect of carvedilol on diastolic function in patients with diastolic heart failure and preserved systolic function. Results of the Swedish Doppler-echocardiographic study (SWEDIC). *European journal of heart failure* 2004; 6(4).  
<http://onlinelibrary.wiley.com/o/cochrane/clcentral/articles/721/CN-00489721/frame.html>  
<http://onlinelibrary.wiley.com/store/10.1016/j.ejheart.2004.02.003/asset/ejhf2004-02-003.pdf?v=1&t=iha38dx&s=afd318d8893c536f26b63147556956748ee85224>  
<http://onlinelibrary.wiley.com/store/10.1016/j.ejheart.2004.02.003/asset/ejhf2004-02-003.pdf?v=1&t=iepj13iu&s=18b120c69a4246bb506edb4dbd69846fccb359d3>.
4. Cleland JG, Tendera M, Adamus J, et al. The perindopril in elderly people with chronic heart failure (PEP-CHF) study. *European heart journal* 2006; 27(19).  
<http://onlinelibrary.wiley.com/o/cochrane/clcentral/articles/489/CN-00576489/frame.html>  
<http://eurheartj.oxfordjournals.org/content/ehj/27/19/2338.full.pdf>.
5. Conraads VM, Metra M, Kamp O, et al. Effects of the long-term administration of nebivolol on the clinical symptoms, exercise capacity, and left ventricular function of patients with diastolic dysfunction: Results of the ELANDD study. *European Journal of Heart Failure* 2012;14(2):219-25. doi: <http://dx.doi.org/10.1093/eurjhf/hfr161>
6. Davis BR, Kostis JB, Simpson LM, et al. Heart failure with preserved and reduced left ventricular ejection fraction in the antihypertensive and lipid-lowering treatment to prevent heart attack trial. *Circulation* 2008;118(22):2259-67. doi: 10.1161/circulationaha.107.762229 [published Online First: 2008/11/13]
7. Deswal A, Richardson P, Bozkurt B, et al. Results of the Randomized Aldosterone Antagonism in heart failure with Preserved Ejection Fraction trial (RAAM-PEF). *Journal of Cardiac Failure* 2011;17(8):634-42. doi: <http://dx.doi.org/10.1016/j.cardfail.2011.04.007>
8. Edelmann F, Wachter R, Schmidt AG, et al. Effect of spironolactone on diastolic function and exercise capacity in patients with heart failure with preserved ejection fraction: The Aldo-DHF randomized controlled trial. *JAMA - Journal of the American Medical Association* 2013;309(8):781-91. doi: <http://dx.doi.org/10.1001/jama.2013.905>
9. Hung MJ, Cherng WJ, Kuo LT, et al. Effect of verapamil in elderly patients with left ventricular diastolic dysfunction as a cause of congestive heart failure. *International journal of clinical practice* 2002; 56(1).  
<http://onlinelibrary.wiley.com/o/cochrane/clcentral/articles/681/CN-00377681/frame.html>.
10. Kasama S, Toyama T, Kumakura H, et al. Effects of candesartan on cardiac sympathetic nerve activity in patients with congestive heart failure and preserved left ventricular

- ejection fraction. *Journal of the American College of Cardiology* 2005;45(5):661-7. doi: 10.1016/j.jacc.2004.11.038 [published Online First: 2005/03/01]
11. Kitzman DW, Hundley WG, Brubaker PH, et al. A randomized double-blind trial of enalapril in older patients with heart failure and preserved ejection fraction: effects on exercise tolerance and arterial distensibility. *Circulation Heart failure* 2010; 3(4). <http://onlinelibrary.wiley.com/o/cochrane/clcentral/articles/761/CN-00752761/frame.html>  
<http://circheartfailure.ahajournals.org/content/3/4/477.full.pdf>
  12. Kurrelmeyer KM, Ashton Y, Xu J, et al. Effects of spironolactone treatment in elderly women with heart failure and preserved left ventricular ejection fraction. *Journal of cardiac failure* 2014; 20(8). <http://onlinelibrary.wiley.com/o/cochrane/clcentral/articles/406/CN-00998406/frame.html>  
[http://www.onlinejcf.com/article/S1071-9164\(14\)00215-2/abstract](http://www.onlinejcf.com/article/S1071-9164(14)00215-2/abstract)
  13. Little WC, Zile MR, Klein A, et al. Effect of losartan and hydrochlorothiazide on exercise tolerance in exertional hypertension and left ventricular diastolic dysfunction. *The American journal of cardiology* 2006;98(3):383-5. doi: 10.1016/j.amjcard.2006.01.106 [published Online First: 2006/07/25]
  14. Mak GJ, Ledwidge MT, Watson CJ, et al. Natural History of Markers of Collagen Turnover in Patients With Early Diastolic Dysfunction and Impact of Eplerenone. *Journal of the American College of Cardiology* 2009;54(18):1674-82. doi: <http://dx.doi.org/10.1016/j.jacc.2009.08.021>
  15. Massie BM, Carson PE, McMurray JJ, et al. Irbesartan in patients with heart failure and preserved ejection fraction. *N Engl J Med* 2008;359(23):2456-67. doi: <http://dx.doi.org/10.1056/NEJMoa0805450>
  16. Parthasarathy HK, Pieske B, Weisskopf M, et al. A randomized, double-blind, placebo-controlled study to determine the effects of valsartan on exercise time in patients with symptomatic heart failure with preserved ejection fraction. *European journal of heart failure* 2009; 11(10). <http://onlinelibrary.wiley.com/o/cochrane/clcentral/articles/071/CN-00728071/frame.html>  
<http://www.ncbi.nlm.nih.gov/pmc/articles/PMC2754503/pdf/hfp120.pdf>
  17. Pitt B, Pfeffer MA, Assmann SF, et al. Spironolactone for heart failure with preserved ejection fraction. *The New England journal of medicine* 2014; 370(15). <http://onlinelibrary.wiley.com/o/cochrane/clcentral/articles/299/CN-00989299/frame.html>
  18. Rector TS, Carson PE, Anand IS, et al. Assessment of long-term effects of irbesartan on heart failure with preserved ejection fraction as measured by the minnesota living with heart failure questionnaire in the irbesartan in heart failure with preserved systolic function (I-PRESERVE) trial. *Circ* 2012;5(2):217-25. doi: <http://dx.doi.org/10.1161/CIRCHEARTFAILURE.111.964221>
  19. Redfield MM, Chen HH, Borlaug BA, et al. Effect of phosphodiesterase-5 inhibition on exercise capacity and clinical status in heart failure with preserved ejection fraction: A randomized clinical trial. *JAMA - Journal of the American Medical Association* 2013;309(12):1268-77. doi: <http://dx.doi.org/10.1001/jama.2013.2024>
  20. Solomon SD, Wang D, Finn P, et al. Effect of candesartan on cause-specific mortality in heart failure patients: the Candesartan in Heart failure Assessment of Reduction in Mortality and morbidity (CHARM) program. *Circulation* 2004;110(15):2180-3. doi: 10.1161/01.cir.0000144474.65922.aa [published Online First: 2004/10/07]

21. Takeda Y, Fukutomi T, Suzuki S, et al. Effects of carvedilol on plasma B-type natriuretic peptide concentration and symptoms in patients with heart failure and preserved ejection fraction. *American journal of cardiology* 2004; 94(4).  
<http://onlinelibrary.wiley.com/o/cochrane/clcentral/articles/248/CN-00481248/frame.html>  
[http://www.ajconline.org/article/S0002-9149\(04\)00707-6/abstract](http://www.ajconline.org/article/S0002-9149(04)00707-6/abstract).
22. van Veldhuisen DJ, Cohen-Solal A, Bohm M, et al. Beta-Blockade With Nebivolol in Elderly Heart Failure Patients With Impaired and Preserved Left Ventricular Ejection Fraction. Data From SENIORS (Study of Effects of Nebivolol Intervention on Outcomes and Rehospitalization in Seniors With Heart Failure). *Journal of the American College of Cardiology* 2009;53(23):2150-58. doi:  
<http://dx.doi.org/10.1016/j.jacc.2009.02.046>
23. Yamamoto K, Origasa H, Hori M. Effects of carvedilol on heart failure with preserved ejection fraction: the Japanese Diastolic Heart Failure Study (J-DHF). *European journal of heart failure* 2013; 15(1).  
<http://onlinelibrary.wiley.com/o/cochrane/clcentral/articles/537/CN-00859537/frame.html>  
<http://onlinelibrary.wiley.com/store/10.1093/eurjhf/hfs141/asset/ejhfhfs141.pdf?v=1&t=iefj60q&s=05fb43d282267b248efddc37e10927936f94060d>.
24. Yip GW, Wang M, Wang T, et al. The Hong Kong diastolic heart failure study: a randomised controlled trial of diuretics, irbesartan and ramipril on quality of life, exercise capacity, left ventricular global and regional function in heart failure with a normal ejection fraction. *Heart (British Cardiac Society)* 2008; 94(5).  
<http://onlinelibrary.wiley.com/o/cochrane/clcentral/articles/478/CN-00629478/frame.html>  
<http://heart.bmj.com/content/94/5/573.full.pdf>.
25. Yusuf S, Pfeffer MA, Swedberg K, et al. Effects of candesartan in patients with chronic heart failure and preserved left-ventricular ejection fraction: the CHARM-Preserved Trial. *Lancet (London, England)* 2003; 362(9386).  
<http://onlinelibrary.wiley.com/o/cochrane/clcentral/articles/464/CN-00440464/frame.html>  
[http://www.thelancet.com/journals/lancet/article/PIIS0140-6736\(03\)14285-7/abstract](http://www.thelancet.com/journals/lancet/article/PIIS0140-6736(03)14285-7/abstract).
26. Zi M, Carmichael N, Lye M. The effect of quinapril on functional status of elderly patients with diastolic heart failure. *Cardiovascular drugs and therapy / sponsored by the International Society of Cardiovascular Pharmacotherapy* 2003; 17(2).  
<http://onlinelibrary.wiley.com/o/cochrane/clcentral/articles/791/CN-00457791/frame.html>.
27. Zile MR, Bourge RC, Redfield MM, et al. Randomized, double-blind, placebo-controlled study of sitaxsentan to improve impaired exercise tolerance in patients with heart failure and a preserved ejection fraction. *Jacc* 2014;Heart failure. 2(2):123-30. doi:  
<http://dx.doi.org/10.1016/j.jchf.2013.12.002>
